# Supplementary material for: Auxin and Cell Wall Invertase Related Signaling during Rice Grain Development
Source: PubMed Central journal article supplement (PMC4844310; doi:10.3390/plants3010095), 2014-02-07
Supplement: plants-03-00095-s001.pdf [file plants-03-00095-s001.pdf]

## Supplementary Material

**Figure S1.** Phylogenetic tree showing relationships between homologues of *OsYUC9*, *OsYUC11* and *OsYUC12* from rice, sorghum and maize. The tree is rooted using *OsYUC8*. The tree was produced in MEGA5.2 [25] using the Neighbour-Joining method [26]. MUSCLE [27] was used for multiple sequence alignment. The bootstrap consensus tree was inferred from 500 replicates [28]. Evolutionary distances were computed using the Poisson correction method [29]. All ambiguous positions were removed for each sequence pair. Highlighted sequences are encoded by genes expressed in endosperm during early caryopsis development.

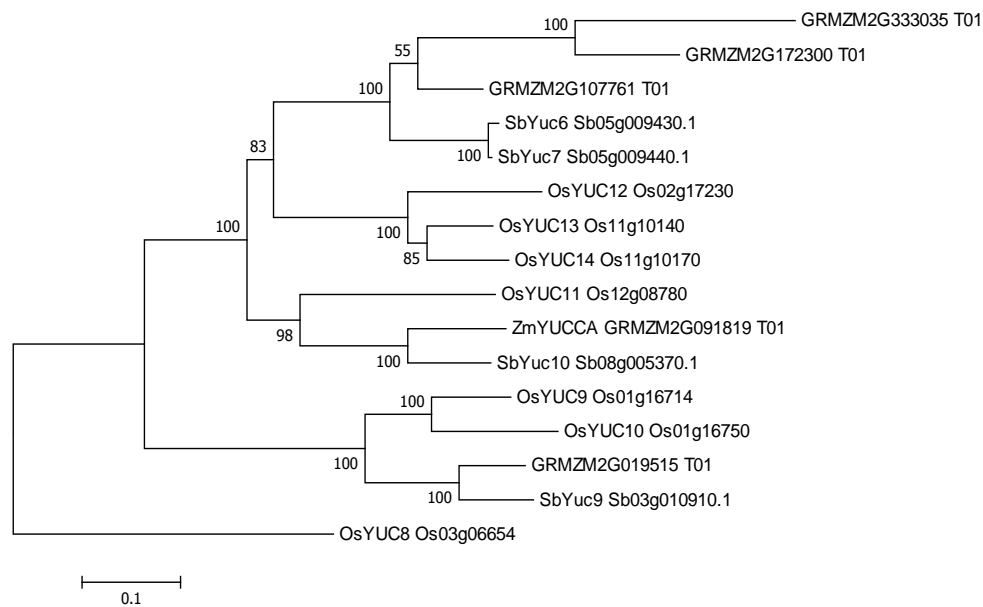

**Figure S2.** Expression of maize orthologue of *OsYUC12*, (*GRMZM2G107761\_T01*) during grain development using RMA normalized data from Genome-wide atlas of transcription during maize development [13] accessed as accession ZM37 from PLEXdb.

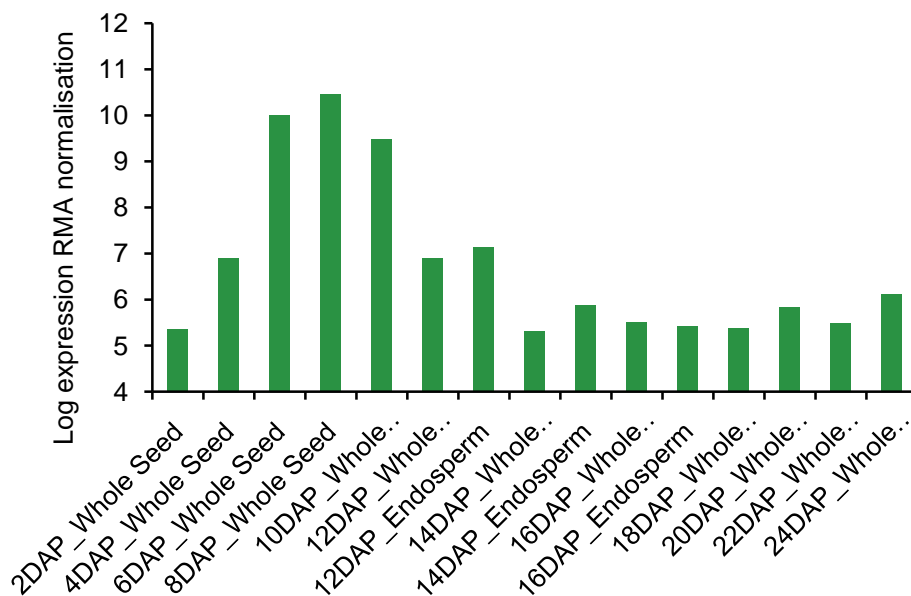

**Figure S3.** Multiple sequence alignment of INVINH/PMEI protein sequences used for the phylogenetic tree in Figure 2. The alignment was carried out using MUSCLE [22]. CLUSTAL multiple sequence alignment by MUSCLE (version 3.8) The sequences shown below as **A**, **B** and **C** are contiguous.

```

Os08g04760 -----MVKPIGSLAIAAVVPELLA-----ALCLVSVCTGGDARWCAVPVSMTEQAQDAVC--GTAHMLK
Os08g04710 -----MNTIPLPLRLLVAVSL-----AVAGVAGDDEKTCPGAPTM---TVESACRNVS--GTQAMYD
Os08g04740 -----MNTIPLFSLPLLVAVSLI-----VAGAGAGDETTTCPGAPSM---TVESACRNVS--HTQAMYD
Os08g04670 -----MEKTTFAVLSLSLLLAG-----GGGADACEDYDV---PMSAAVAFERASTGRAMSE
Os08g04700 -----MEKPAAVFAVLSMGSATAT-----LLLLLAGGGVADACSDWDVPSMSAAVQORAS--TGRTISQ
Os08g04650 -----MERSATVFVALTLVAGS-----VVVVVVVDACDGVPRM-----SAVEACKQAS--VGPAMSR
Os08g04660 -----MSVALTISLTLTAASLLA-----GVADGCDGVPRM-----SAVDACKQAS--TAGVMWQ
Os08g04690 -----MTRASATGFLAAVAMALA-----VAAVVVDGCDNVPSM-----SMDDACKLAS--TSQPLLA
Os08g04680 -----MNKRDAIVFLVLAAMAVVV-----IVVDACDGVPRM-----SMSLEDTCKAFG--TAAAPT
Os04g36770 -----MAARLVFSLLLTVACSHA-----ALAAAASSS-----AVEDTCAKATASGSRKDLAP
Os08g25070 -----MTTAMASSSRGVTVPFLMILPFLF-----VVAALPAEIVTVGGD-----ILLPCKTVGGG-STYFDVQ
Os12g03510 -----MVSSHGIVNAFFLFAVAL-----VAAHQAGHAANADS-----FMGACKIVAGSSSGVSVT
Os11g03740 -----MSSINGVSLFLLAVLL-----PASQLAAGIDS-----ALYGACTVAGN-SGVVSVT
Os11g03750 -----MASSNNGVSLFLLAVLLI-----AASQLAAGINS-----AVYGACTIAG-SGSLIGVT
Os07g14130 -----MADHQTLSAVFLLVLP-----HAACMMAKPSSST-----LLQDKCLYAA--GDRFSYD
Os02g46360 -----MRRLLVFPVLLMLGLSTC-----ESSVLQDCKSVAAG-HKYVTYN
Os04g49730 -----MKLVRSFSLVFLVLSLL-----LTSSTTSRAS-----LVDDACKSPAAS-HADIGYA
Os04g49720 -----MAFLRALSLPVLFTLLLL-----AASTSDAS-----ILEETCKSLAGN-HTAIDYP
Os05g20570 -----MGPAHGHLVLLVAVALLSAGF-----LPHAVAKGGVAPP-----AVADIC-----SRTFFPD
Os01g14940 -----MARSLAHATLLLVAVVVA-----AAACWTTAAGENE-----EVARIKCK-----TSYPE
Os03g61530 -----MAAASLRLVVVAAVAIS-----LRGAAATAV-----TVEDAC-----RHRTRHEA
Os01g20970 -----MASSPYHAAGVAVLAILL-----AAPAEAGAPTAAPLANY-----SLEDACK-----KTGPHYG
Os05g29740 -----MASSSVLVVVAACLAIA-----LVCLANVAPASCARATAALPHASIAETCSF-----VDDHK
Os02g01300 -----MATLCSGVCFLFVIMVIA-----SSPAVAAAGED-----IVETCKQCSRS-NPNVNYT
Os03g40900 -----MFLALVILLAVAAGSQPAATSTPATVSPAPAVS-----VVAAPAGELCGGAGARRDQREFFVRGCC-----ARTLYPR
Os08g12600 -----MATVLVLMVSTGGLSPPCAAAAKEEKPVVVL-----PPAAAPGEAFPAEAAA-----FVRSCETALP--AERDASS
Os08g12160 -----MSRSSSMATVILVLMVVSAGLSPPCAAAAKEEKPVVVL-----PPAAAPGEAFPSADAAA-----FVRSCDTALQ--ADRDGSS
Os08g12230 -----MSRSSSMATVILVLMVVSAGLSPPCAAAAKEEKPVVVL-----PPAAAPGEAFPSADAAA-----FVRSCDTALQ--ADRDGSS
Os08g12520 -----MSRSSMAAVFLVVLIAINVCLSPQGATAAPEGELHKLNLLEL-----PPPLPPGKEPSTEAYR-----FTQVQDFGTSTFEQMIGA
Os08g19780 -----M-----TAVLLQEPSPFAIYQ-----FSRTICRIP-----KDPYKI
Os03g43820 -----MDLGQFVSTKVSSIFTMASSPSLALSFLVLLVLATFTTTTTLATNML-----PPSAPALSPASSAAAKE-----FLRATCT-----SKSELPE
Os10g10700 MEQVHLRSLNFTPNPIVVLQPQNTQPPYNSLLNLSLKFPLCISTAKPATASSSRNNGASSSHDRLLRLRRRTTVVVGSGDSQGGHFAAPPVAPFAAVALFRASC-----ASTLYRL
Os10g10630 -----MPSSRAGFRHVLLVLMFFAAAV-----AARGADAASFVTTTRFCGAAAAASFCLSRC-----ATTVYPA
Os10g10560 -----MAAASATQATAEAAA-----PCSTTKTESTSSSS-----FLRARC-----ATTRYPD
Os10g10620 -----MAPLPPRAISLVFLFLFT-----AASATRRLDDAGQPTAASSATAFLRSR-----ATTRYPD
Os10g36500 -----MARSLSLLLVACFLVAGATAAR-----PAPSTSGAAIIS-----FVRSWC-----AGTKYPA
Os04g01570 -----MAITRRHPPLLLFLAVAAA-----ATIAGASQSTRPRPAVSPAAAADFVRRSC-----RATRYPQ
Os06g49760 -----MSRSSLAMALLLAAFAA-----AATANSGAAPAASD-----FIRKSC-----RATQYPA
Os08g24160 -----MALLLLAFAA-----AATANGAAPAASN-----FIRKLC-----RATQYPA
Os12g37480 -----MASSPPLVACVLLAAVVFTAVAPPAGAVCVPRNGKAAPGKPGMSAPPKK-----LTPAPPTTPPKAKFILPGGGDLVKALC-----AKTDYPV
Os08g01670 -----MASSMAPAAMAAILLLALLMPATLCSRSGPPSSKHGH-----GGHAKRAPPASPVVVPVAPQAAALVRATC-----NSTAYYD
Os12g18560 -----MASMAPSAMVILVLLVVLPSSTLCSRAGPSSKHGHGG-----HAKRVPPASVPPPPPPPPAPAALVRATC-----NSTSYD
Os02g46290 -----MHPITATLLAAA-----IAPGLTVGSPS-----LINETC-----TATSNYG
Os02g01310 -----MSIRFPMESRSSSSSVVMCCVLMIM-----IAAAAHAQEAEACASPM-----SIEEACRGASET-HHAVAYD
Os05g05640 -----MKASSLAAVAAV-----VAAACSGRAPVAEA-----TIESTCGAAAKG-DRVDVVG
Os03g01020 -----MRMSKALAAVVAISVLS-----AAAMGVDA-----TVESTCSDAAAS-DKRVHLA
Os02g33130 -----MRPSSLALVIVAT-----AILTLSGAAHA-----DVQGTCKAAAGI-DSRISYK
Os02g33380 -----MAQRASRRPAAAAAAVVVA-----VVLAVSGVGA-----TPETACRAAAEE-DRVDYD
Os02g33390 -----MLMMMKPYTAALLAVVA-----VLGVVAVDA-----TVVTTCRAAADA-DARVDYD
Os08g42890 -----MARPAAAVTVLLAVVVV-----SVAASLPSAVVGDAR-----FVARTCK-----RTNHT
Os01g02070 -----MADAG-----FIADTCKN-----KTHNA

```

(A)



**Figure S4.** Comparison of expression of all cell wall invertases during grain development using RMA normalized data from Expression data for reproductive development in rice [20] accessed as accession OS5 from PLEXdb. Data represent the mean of 3 samples  $\pm$  standard error.

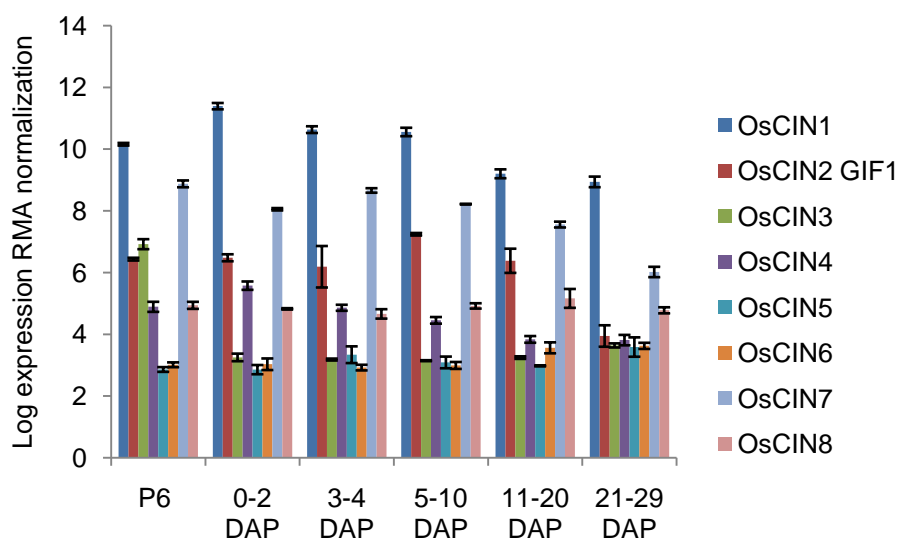

**Table S1.** Genes with a pairwise mutual coexpression rank <50 with each of the bait genes, *OsINVINH3*, *OsIAA29* and *OsYUC12*. Pearson correlation coefficients (PCC) are shown. Genes listed in order of increasing mutual co-expression rank. Cysteine rich proteins are coloured yellow, ZmEBE homologues are coloured red, INVINH/PMEI homologues are coloured green, putative transcriptional regulators are coloured blue.

| Transcript ID | PCC <i>OsYUC12</i> | PCC <i>OsIAA29</i> | PCC <i>OsINVINH3</i> | Product Description                           |
|---------------|--------------------|--------------------|----------------------|-----------------------------------------------|
| Os12g13960.1  | 0.8738             | 0.9242             | 0.9658               | LTPL33 [37]                                   |
| Os02g07628.1  | 0.8669             | 0.9171             | 0.9448               | DEF5 [37]                                     |
| Os11g45360.1  | 0.8901             | 0.8848             | 0.9293               | DEFL15 [37]                                   |
| Os01g70680.1  | 0.8909             | 0.8474             | 0.9399               | DEF1 [37]                                     |
| Os02g07624.1  | 0.8217             | 0.9411             | 0.9280               | DEF4 [37]                                     |
| Os11g18140.1  | 0.8363             | 0.9109             | 0.9132               | ZmEBE 1 homologue                             |
| Os04g49720.1  | 0.8391             | 0.8957             | 1.0000               | OsINVINH3                                     |
| Os06g17480.1  | 0.8499             | 0.8796             | 0.9102               | OsHAP3D [34]                                  |
| Os05g07850.1  | 0.8366             | 0.8900             | 0.9073               | Leucine-rich repeat receptor-like kinase [39] |
| Os11g14880.1  | 0.8300             | 0.8920             | 0.9009               | LTPL32 [37]                                   |
| Os11g11430.1  | 0.8189             | 1.0000             | 0.8957               | OsIAA29 [40]                                  |
| Os01g28810.1  | 0.8250             | 0.9185             | 0.8727               | expressed protein (nuclear)                   |
| Os04g12639.1  | 0.7898             | 0.9329             | 0.8954               | ZmEBE 1 homologue                             |
| Os08g35670.1  | 0.8177             | 0.8742             | 0.8963               | OsRR33 [35]                                   |
| Os12g12230.1  | 0.8682             | 0.8561             | 0.8678               | DEFL43 [37]                                   |
| Os02g15710.1  | 0.8613             | 0.8141             | 0.8996               | plastocyanin like (extracellular)             |
| Os08g16650.1  | 0.7807             | 0.9250             | 0.8677               | hypothetical protein (nuclear)                |
| Os02g54960.1  | 0.7439             | 0.9141             | 0.8948               | ZmEBE 1 homologue                             |
| Os02g07550.1  | 0.7717             | 0.8823             | 0.8725               | DEFL1 [37]                                    |

**Table S1.** *Cont.*

| Transcript ID | PCC <i>OsYUC12</i> | PCC <i>OsIAA29</i> | PCC <i>OsINVINH3</i> | Product Description                                         |
|---------------|--------------------|--------------------|----------------------|-------------------------------------------------------------|
| Os09g11790.1  | 0.8456             | 0.8099             | 0.8935               | DEFL14 [37]                                                 |
| Os11g03870.1  | 0.8439             | 0.8172             | 0.8885               | LTPL31 [37]                                                 |
| Os01g26320.1  | 0.8027             | 0.8249             | 0.8926               | ZmEBE 1 homologue                                           |
| Os08g42890.1  | 0.7936             | 0.8257             | 0.9268               | INVINH/PMEI homologue                                       |
| Os01g12030.1  | 0.8342             | 0.8226             | 0.8387               | endoglucanase GH9 (plasma membrane)                         |
| Os01g67800.1  | 0.7783             | 0.8638             | 0.8234               | retrotransposon protein, putative,                          |
| Os12g27940.1  | 0.8283             | 0.8332             | 0.8282               | low glutelin content-like (extracellular)                   |
| Os02g17230.1  | 1.0000             | 0.8189             | 0.8391               | <i>OsYUC12</i>                                              |
| Os02g07600.1  | 0.7703             | 0.8390             | 0.8661               | DEF3 [37]                                                   |
| Os03g39170.1  | 0.7341             | 0.8901             | 0.8410               | frigida, putative, expressed                                |
| Os05g48560.1  | 0.7671             | 0.8302             | 0.8339               | expressed protein                                           |
| Os10g19925.1  | 0.7100             | 0.8584             | 0.8487               | DEFL68 [37]                                                 |
| Os08g04740.1  | 0.7645             | 0.8646             | 0.8193               | INVINH/PMEI homologue                                       |
| Os11g41880.1  | 0.8008             | 0.7907             | 0.8628               | Homologue of OBERON1/OBERON2<br>nuclear PHD finger proteins |
| Os02g38940.1  | 0.7604             | 0.8958             | 0.8108               | cytochrome P450 71D8 (P450 CP7)                             |
| Os11g11530.1  | 0.7693             | 0.8206             | 0.8549               | ZmEBE 1 homologue                                           |
| Os07g41290.1  | 0.7223             | 0.8968             | 0.8302               | DEFL13 [37]                                                 |

**Table S2.** Primers used for qRT-PCR.

| Gene ID    | L primer                | Tm °C | R primer              | Tm °C | Product size |
|------------|-------------------------|-------|-----------------------|-------|--------------|
| Os02g42314 | CTGCGAGCTGAAACACTTTG    | 59.78 | TTCTCGCTGCACCTCCTTAT  | 59.98 | 105          |
| Os04g49720 | GGCCATCGACTACCCCTACT    | 60.35 | CCGCCTCGGTGATCCT      | 60.76 | 107          |
| Os11g11430 | CAACTATTCCATGTCACCATTTG | 59.26 | ATGGGACATCACCAAGGAAG  | 59.78 | 131          |
| Os02g17230 | GAGTTATCGACGTGCTCGAA    | 59.03 | TGCTTTACCATTCCTTTAGCC | 59.35 | 147          |
| Os07g41290 | TTGCTACGCACATGTTGAGG    | 60.87 | TGCCTGCAATACTGAGATGC  | 59.98 | 123          |
| Os11g14880 | CTCATCGCCAGGTTTTGG      | 60.19 | GATGCCAGGCTGATCAATTT  | 60.04 | 103          |
| Os11g18140 | AGATCGCGTGGGTTGATAAT    | 59.42 | ACAGTGGAAACTGGCCTGA   | 59.25 | 112          |
| Os06g17480 | GTCGGCCCAACTATGAGTA     | 59.96 | TGCTAATCGATCGACAGACG  | 59.97 | 115          |
